# Supplementary material for: A Facile Microwave Hydrothermal Synthesis of ZnFe2O4/rGO Nanocomposites for Supercapacitor Electrodes
Source: MDPI journal article supplement (doi:10.3390/nano13061034), 2023-03-13
Supplement: s1 [file s1]

# A Facile Microwave Hydrothermal Synthesis of $\text{ZnFe}_2\text{O}_4/\text{rGO}$ Nanocomposites for Supercapacitor Electrodes

Xiaoyao Mo <sup>1</sup>, Guangxu Xu <sup>1</sup>, Xiaochan Kang <sup>1</sup>, Hang Yin <sup>1</sup>, Xiaochen Cui <sup>2</sup>, Yuling Zhao <sup>3</sup>, Jianmin Zhang <sup>2</sup>, Jie Tang <sup>4,\*</sup> and Fengyun Wang <sup>1,\*</sup>

<sup>1</sup> College of Physics, Qingdao University, No. 308 Ningxia Road, Qingdao 266071, China

<sup>2</sup> College of Mechanical and Electrical Engineering, Qingdao University, No. 308 Ningxia Road, Qingdao 266071, China

<sup>3</sup> State Key Laboratory of Bio Fibers and Eco Textiles, Qingdao University, No. 308 Ningxia Road, Qingdao 266071, China

<sup>4</sup> National Institute for Materials Science, 1-2-1 Sengen, Tsukuba 305-0047, Japan

\* Correspondence: author: tang.jie@nims.go.jp (J.T.), fywang@qdu.edu.cn (F.W.)

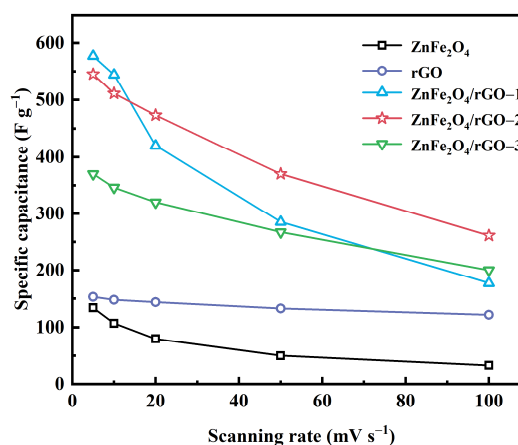

**Figure S1.** Plot of Scanning rate and specific capacitance from 5 mV s<sup>-1</sup> to 100 mV s<sup>-1</sup>.

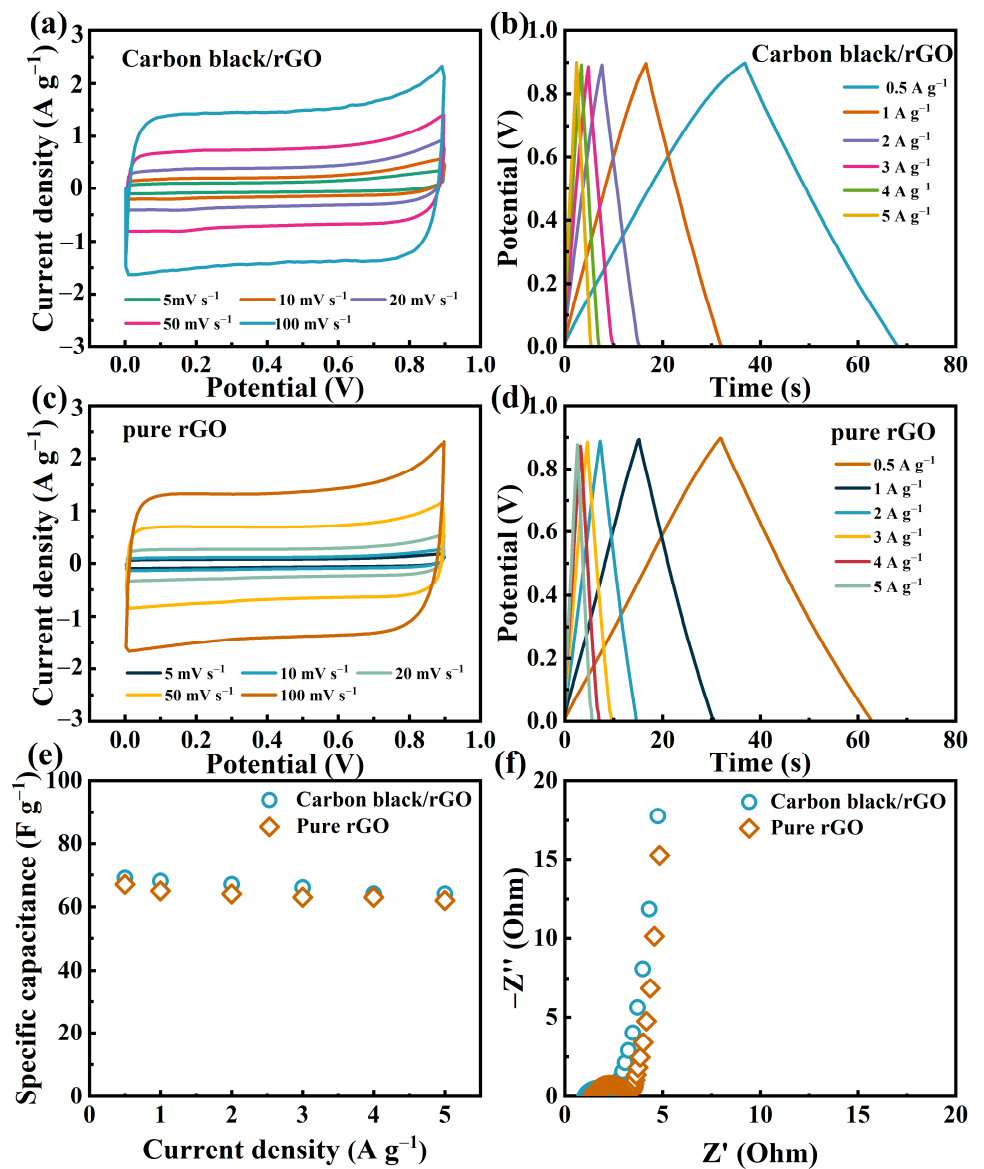

**Figure S2.** (a) CV curves and (b) Charge/discharge profiles of carbon black/rGO, (c) CV curves and (d) Charge/discharge curves of carbon black/rGO of pure rGO, (e) Rate performance and (f) Nyquist plots of carbon black/rGO and pure rGO.

Figure S2a, c exhibited the CV curves of carbon black/rGO and pure rGO from 5 mV s<sup>-1</sup> to 100 mV s<sup>-1</sup>. The typical rectangular of CV curves indicate an EDLC capacitive behavior during the charging/discharging process. Besides, symmetrical charging/discharging triangles with neglectable voltage drop in Figure S2b, d demonstrate the low internal resistances of the carbon black/rGO and pure rGO. According to the charge/discharge profiles at different current density, we calculated the specific capacitance of carbon black/rGO and pure rGO, the results were shown in Fig, S2e. The comparable rate performance and Nyquist plots (Figure S2f) of carbon black/rGO and pure rGO exhibited the high conductivity of synthesized rGO by microwave hydrothermal process.
